# Supplementary material for: A structural and electrochemical study of lithium-ion battery electrolytes using an ethylene sulfite solvent: from dilute to concentrated solutions
Source: Royal Society of Chemistry journal article supplement (doi:10.1039/d2cp03616a), 2022-01-01
Supplement: d2cp03616a1.pdf [file d2cp03616a1.pdf]

## Electronic Supplementary Information

# Structural and electrochemical study of lithium-ion battery electrolytes using an ethylene sulfite solvent: from dilute to concentrated solutions

*Kenzo Suzuki,<sup>a,‡</sup> Saki Sawayama,<sup>a,‡</sup> Yuna Deguchi,<sup>a</sup> Ryansu Sai,<sup>a</sup> Jihae Han,<sup>a</sup> and Kenta Fujii<sup>a,\*</sup>*

<sup>a</sup> Graduate School of Sciences and Technology for Innovation, Yamaguchi University, 1-16-2 Tokiwadai, Ube, Yamaguchi 755-8611, Japan.

\* To whom correspondence should be addressed. E-mail: [k-fujii@yamaguchi-u.ac.jp](mailto:k-fujii@yamaguchi-u.ac.jp)

**Fraction of the FSA species:  $c_f/c_T$ ,  $c_b/c_T$ , and  $c_{agg}/c_T$ .**

The integrated intensity ( $I_f$ ) of the free FSA anion is given as  $I_f = \varepsilon_f c_f$ , where  $\varepsilon_f$  is the molar extinction coefficient, and  $c_f$  is the concentration of the free FSA anion in the LiFSA/ES solutions. Here, we note that no coordination of FSA anions to Li-ions occurs in the dilute solutions ( $<2.0$  mol dm<sup>-3</sup>). Thus, all of the FSA anions exist as a free FSA in the bulk, resulting in the relation:  $c_{Li} = c_f$  to determine the  $\varepsilon_f$  value ( $= I_f/c_f$ ). In the  $c_{Li}$ -range of 2.0–2.5 mol dm<sup>-3</sup>, the Li ions coexist as two types of mononuclear Li-ion complexes, i.e.,  $[\text{Li}(\text{ES})_4]^+$  and contact ion-pair  $[\text{Li}(\text{ES})_n(\text{FSA})_m]$  as described in the manuscript. The  $c_b$  (concentration of the bound FSA) is thus calculated by  $c_b = c_T - c_f$ , where  $c_T$  is the total concentration of FSA anions in solutions, and then the  $\varepsilon_b$  can be determined from the relation,  $I_b = \varepsilon_b c_b$ . At  $\geq 3.0$  mol dm<sup>-3</sup>, the aggregate FSA coexists with both free and bound FSA species in the solutions. The concentration of aggregate FSA ( $c_{agg}$ ) is thus obtained as follows,  $c_{agg} = c_T - c_f + c_b$ . The fraction of free, bound (CIP), and aggregate FSA species in the solutions are thus calculated by  $c_f/c_T$ ,  $c_b/c_T$ , and  $c_{agg}/c_T$ , respectively.

**Table S1.** Molar ratio (salt: solvent), concentrations of LiFSA salt ( $c_{Li}$ ), ES ( $c_{ES}$ ), density ( $d$ ), and refractive index ( $n_2$ ) for LiFSA/ES solutions.

| LiFSA/ES system |                                 |                                 |                          |       |
|-----------------|---------------------------------|---------------------------------|--------------------------|-------|
| LiFSA : ES      | $c_{Li}$ / mol dm <sup>-3</sup> | $c_{ES}$ / mol dm <sup>-3</sup> | $d$ / g cm <sup>-3</sup> | $n_2$ |
| –               | 0                               | 13.2                            | 1.430                    | 1.44  |
| 1 : 52.5        | 0.25                            | 12.9                            | 1.441                    | 1.44  |
| 1 : 24.1        | 0.5                             | 12.8                            | 1.465                    | 1.44  |
| 1 : 16.0        | 0.75                            | 12.3                            | 1.480                    | 1.44  |
| 1 : 12.0        | 1.0                             | 12.1                            | 1.495                    | 1.44  |
| 1 : 5.24        | 2.0                             | 10.8                            | 1.557                    | 1.44  |
| 1 : 4.02        | 2.5                             | 10.3                            | 1.586                    | 1.44  |
| 1 : 3.24        | 3.0                             | 9.7                             | 1.610                    | 1.44  |
| 1 : 2.50        | 3.6                             | 9.1                             | 1.644                    | 1.44  |
| 1 : 2.11        | 4.0                             | 8.5                             | 1.668                    | 1.43  |
| 1 : 1.50        | 4.9                             | 7.4                             | 1.713                    | 1.43  |

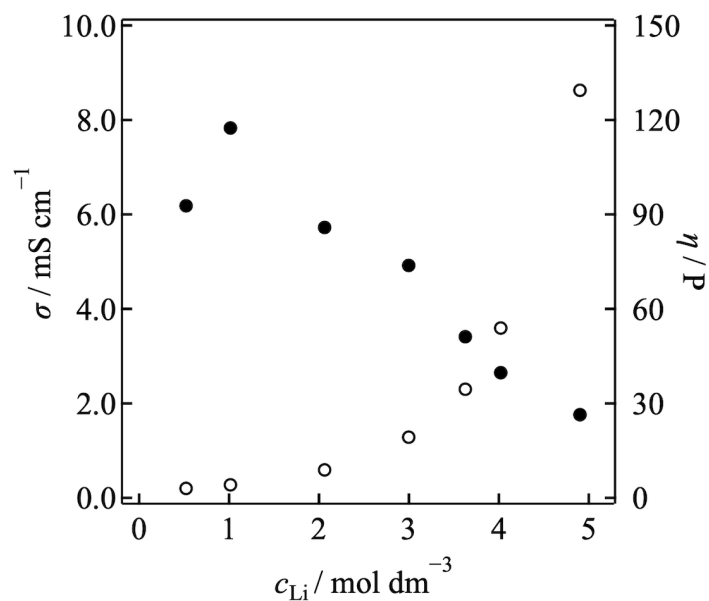

**Figure S1.**  $c_{\text{Li}}$  dependences of ionic conductivity (filled circles) and viscosity (open circles) for LiFSA/ES solutions at 298 K.

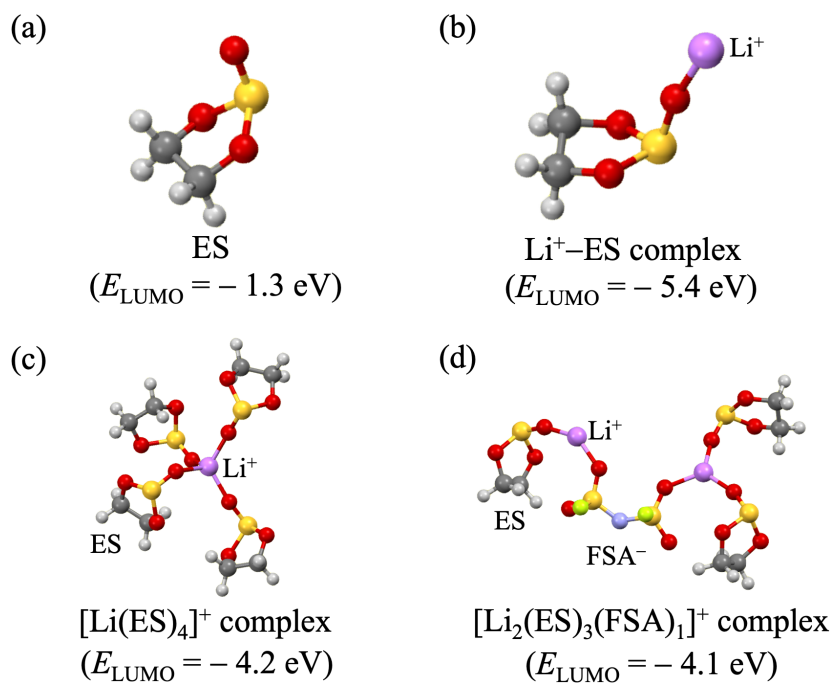

**Figure S2.** The optimized geometries of (a) isolated ES, (b)  $\text{Li}^{\text{+}}$ -ES complex, (c)  $[\text{Li}(\text{ES})_4]^{\text{+}}$  complex, and (d)  $[\text{Li}_2(\text{ES})_3(\text{FSA})_1]^{\text{+}}$  complex and their LUMO energies obtained from DFT calculations.

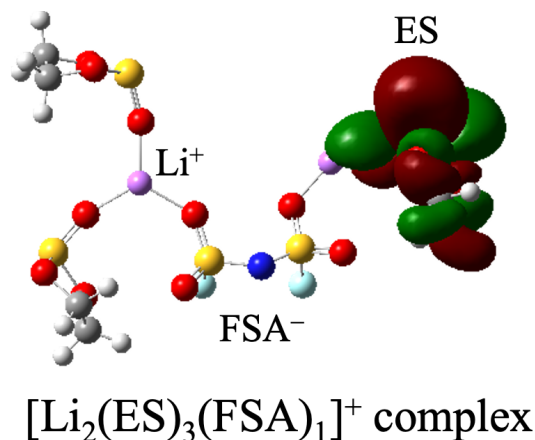

**Figure S3.** The location of LUMOs on the optimized  $[\text{Li}_2(\text{ES})_3(\text{FSA})_1]^+$  complex using DFT calculations.

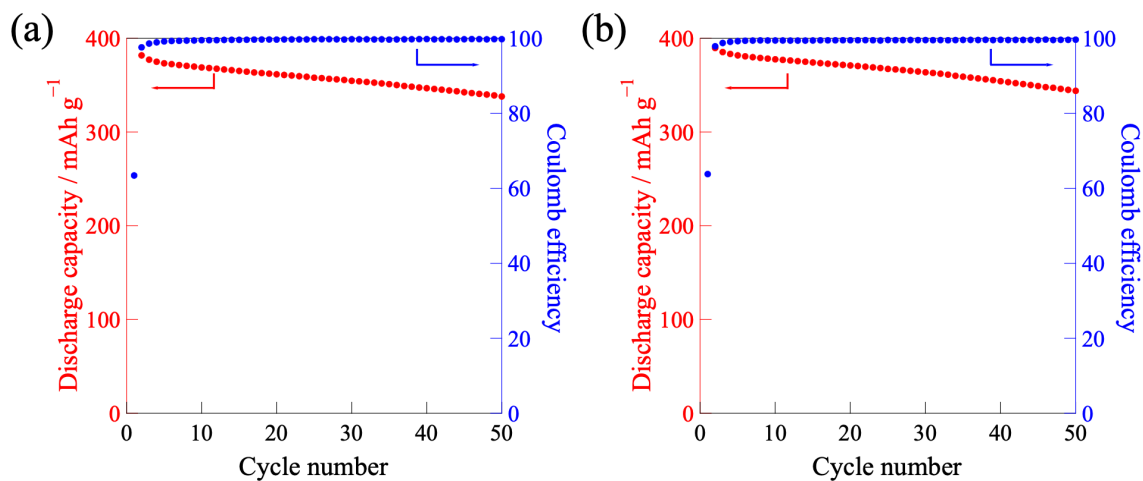

**Figure S4.** Cycling performance (red, left axis) and coulomb efficiency (blue, right axis) of the (a) 3.6 mol dm<sup>-3</sup> and (b) 1.0 mol dm<sup>-3</sup> LiFSA/ES solutions. The coulombic efficiencies at the initial cycle are 63.4% and 63.8% for the 3.6 and 1.0 mol dm<sup>-3</sup> solutions, respectively.
